# Supplementary material for: Rapid and sensitive detection of neuron specific enolase with a polydopamine coated plasmonic chip utilizing a rear-side coupling method
Source: Royal Society of Chemistry journal article supplement (doi:10.1039/c7an01577a), 2017-12-12
Supplement: c7an01577a1.pdf [file c7an01577a1.pdf]

Supporting information for

# Rapid and sensitive detection of neuron specific enolase with a polydopamine coated plasmonic chip utilizing rear-side coupling method

*Mana Toma,<sup>1</sup> Shota Izumi,<sup>2</sup> Keiko Tawa<sup>1,\*</sup>*

1. Department of Applied Chemistry for Environment, School of Science and Technology, Kwansei Gakuin University, Sanda, Japan 669-1337.
2. Department of Chemistry, Graduate School of Science and Technology, Kwansei Gakuin University, Sanda, Japan 669-1337.

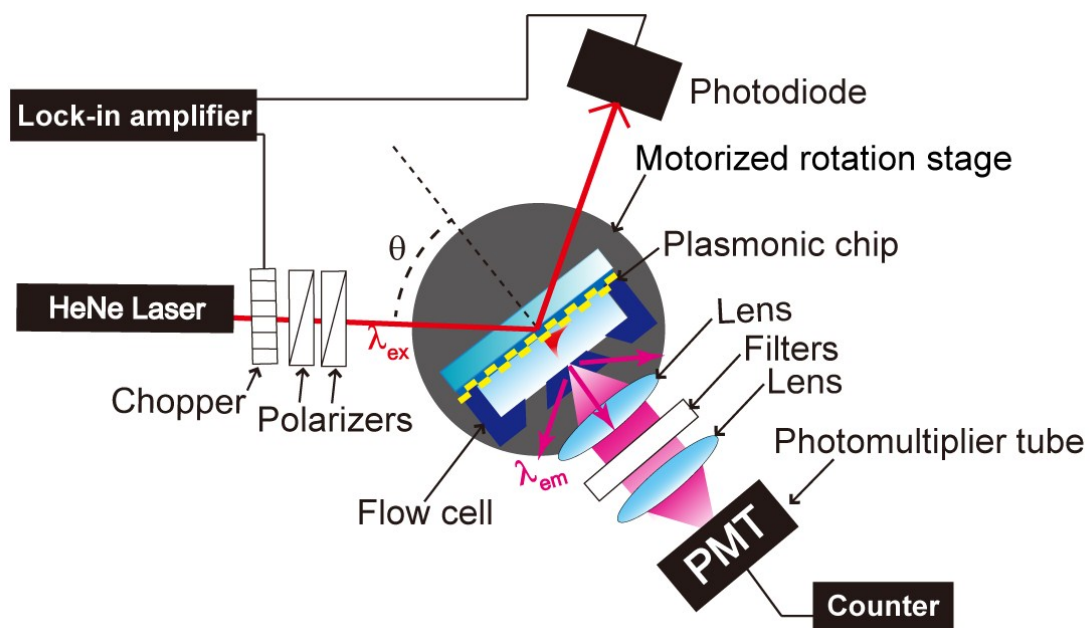

Figure S 1 Optical setup for angular resolved reflectivity and fluorescence intensity measurement.

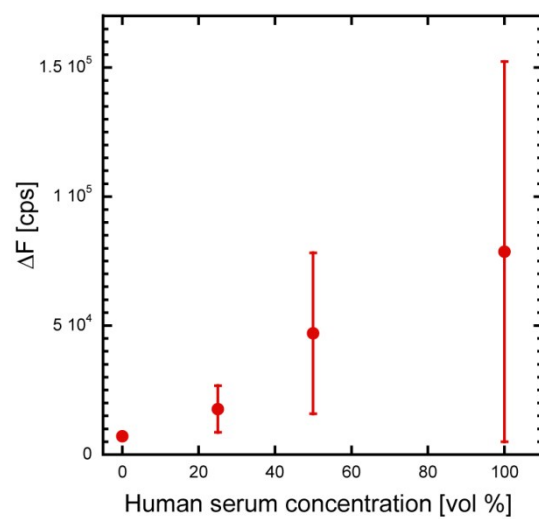

Figure S 2 Fluorescence signals associated with non-specific binding as a function of the dilution ratio of human serum to PBST.
